# Supplementary material for: Co-precipitation based on layered double hydroxides and anionic surfactants for preconcentration of six benzoylurea insecticides in soft drinks before simultaneous analysis by high-performance liquid chromatography
Source: Royal Society of Chemistry journal article supplement (doi:10.1039/d1ay01435h), 2021-01-01
Supplement: d1ay01435h1.pdf [file d1ay01435h1.pdf]

## **Supplementary Information**

# **Co-precipitation based on layered double hydroxides and anionic surfactants for preconcentration of six benzoylurea insecticides in soft drinks before simultaneous analysis by high-performance liquid chromatography**

Yanawath Santaladchaiyakit<sup>1,\*</sup>, Wisansaya Sila-am<sup>1</sup>, Suwanida Sribunrueng<sup>1</sup>, Netsirin Gissawong<sup>2</sup>, and Supalax Srijaranai<sup>2</sup>

<sup>1</sup>Department of Chemistry, Faculty of Engineering, Rajamangala University of Technology Isan, Khon Kaen Campus, Khon Kaen 40000, Thailand

<sup>2</sup>Materials Chemistry Research Unit, Department of Chemistry and Center of Excellence for Innovation in Chemistry, Faculty of Science, Khon Kaen University, Khon Kaen 40002, Thailand

\*Corresponding author: Tel.: +66 4333 8870 ext. 3610, 3611; Fax: +66 4333 8869

E-mail: sanyanawa@gmail.com, yanawath.sa@rmuti.ac.th (Y. Santaladchaiyakit)

**Table S1** Chemical structures and physicochemical properties of benzoylurea insecticides and surfactants used in this study

| Name                | Structure/CAS Number                                                                                   | Mw (g/mol) | Aqueous solubility (mg/L)                  | Log K <sub>ow</sub>                   |
|---------------------|--------------------------------------------------------------------------------------------------------|------------|--------------------------------------------|---------------------------------------|
| Diflubenzuron (DFL) | 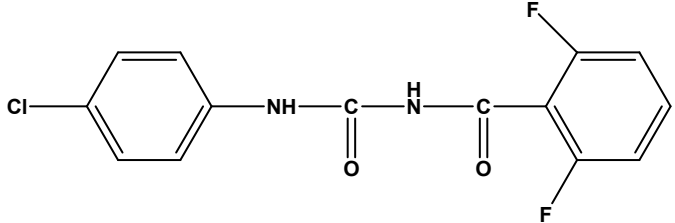<br>CAS: 35367-38-5  | 310.69     | 5.164 <sup>a</sup><br>(0.080) <sup>b</sup> | 3.59 <sup>a</sup> (3.88) <sup>b</sup> |
| Triflumuron (TRF)   | <br>CAS: 64628-44-0  | 358.70     | 0.352 <sup>a</sup><br>(0.025) <sup>b</sup> | 4.24 <sup>a</sup> (4.91) <sup>b</sup> |
| Hexaflumuron (HXF)  | <br>CAS: 86479-06-3 | 461.14     | 0.018 <sup>a</sup><br>(0.027) <sup>b</sup> | 5.64 <sup>a</sup> (5.68) <sup>b</sup> |

|                                              |                                                                                                             |               |                                                  |                                                    |
|----------------------------------------------|-------------------------------------------------------------------------------------------------------------|---------------|--------------------------------------------------|----------------------------------------------------|
| <p>Teflubenzuron (TFL)</p>                   | 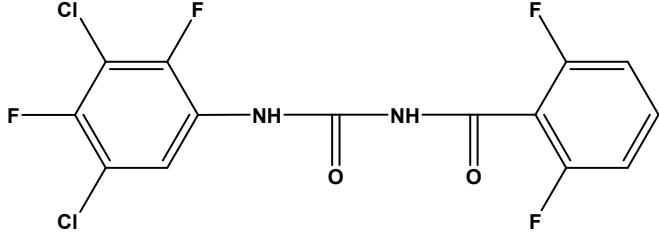 <p>CAS: 83121-18-0</p>   | <p>381.12</p> | <p>0.511<sup>a</sup><br/>(0.019)<sup>b</sup></p> | <p>4.64<sup>a</sup> (4.56)<sup>b</sup></p>         |
| <p>Fluazuron (FLU)</p>                       |  <p>CAS: 86811-58-7</p>   | <p>506.21</p> | <p>0.029<sup>a</sup><br/>(0.020)<sup>b</sup></p> | <p>5.23<sup>a</sup> (5.10)<sup>b</sup></p>         |
| <p>Flufenoxuron (FLF)</p>                    |  <p>CAS: 101463-69-8</p> | <p>488.77</p> | <p>0.007<sup>a</sup><br/>(0.002)<sup>b</sup></p> | <p>5.97<sup>a</sup> (Not reported)<sup>b</sup></p> |
| <p>Sodium dodecylbenzenesulfonate (SDBS)</p> |                         | <p>348.48</p> | <p>134.1<sup>a</sup> (800)<sup>b</sup></p>       | <p>3.00<sup>a</sup> (1.96)<sup>b</sup></p>         |

|                                |                                                                                                                                           |                                         |                                                                                    |                                                          |
|--------------------------------|-------------------------------------------------------------------------------------------------------------------------------------------|-----------------------------------------|------------------------------------------------------------------------------------|----------------------------------------------------------|
|                                | CAS: 25155-30-0                                                                                                                           |                                         |                                                                                    |                                                          |
| Sodium dodecylsulfate (SDS)    | 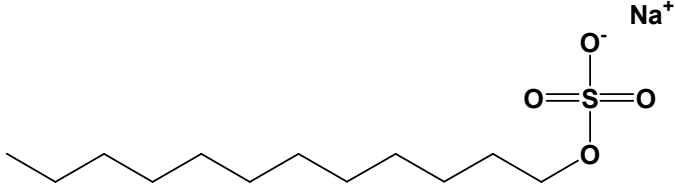<br>CAS: 151-21-3                                       | 288.38                                  | 616.8 <sup>a</sup><br>(1×10 <sup>5</sup> ) <sup>b</sup>                            | 1.69 <sup>a</sup> (1.60) <sup>b</sup>                    |
| Sodium 1-nonanesulfonate (SNS) | <br>CAS: 35192-74-6                                      | 230.30                                  | Not reported <sup>a</sup><br>(Not reported) <sup>b</sup><br><br>; Soluble in water | Not reported <sup>a</sup><br>(Not reported) <sup>b</sup> |
| Sodium 1-hexanesulfonate (SHS) | <br>CAS: 2832-45-3; CAS: 207300-91-2 (monohydrate form) | 188.22;<br>206.24<br>(monohydrate form) | 1×10 <sup>6</sup> <sup>a</sup><br>(Not reported) <sup>b</sup>                      | -2.07 <sup>a</sup><br>(Not reported) <sup>b</sup>        |

<sup>a</sup> Obtained by calculating using the Estimation Programs Interface (EPI) Suite™ v.4.1 (Environmental Protection Agency, USA)

<sup>b</sup> Experimental database match as reported in EPI software

**Table S2** The calculation results of XRD reflections obtained for the studied LDH forms

| LDH form     | XRD reflection series  |        |                        |        |                        |        |
|--------------|------------------------|--------|------------------------|--------|------------------------|--------|
|              | (003)                  |        | (006)                  |        | (009)                  |        |
|              | 2 $\theta$<br>(degree) | d (nm) | 2 $\theta$<br>(degree) | d (nm) | 2 $\theta$<br>(degree) | d (nm) |
| LDH-1        | 11.4255                | 0.7739 | 22.5702                | 0.3936 | 34.9947                | 0.2562 |
| SDBS-LDH     | 10.9189                | 0.8096 | 22.3302                | 0.3978 | 34.9947                | 0.2562 |
| BUs-SDBS-LDH | 9.1593                 | 0.9647 | 22.0636                | 0.4026 | 35.2346                | 0.2545 |
|              |                        |        |                        |        |                        |        |
| LDH-2        | 11.0754                | 0.7982 | 20.3039                | 0.4370 | 34.9947                | 0.2562 |
| SDS-LDH      | 11.0256                | 0.8018 | 20.0373                | 0.4428 | 35.7412                | 0.2510 |
| BUs-SDS-LDH  | 10.3590                | 0.8533 | 20.0373                | 0.4428 | 36.7543                | 0.2443 |
|              |                        |        |                        |        |                        |        |
| LDH-3        | 11.1589                | 0.7923 | 22.8368                | 0.3891 | 34.9947                | 0.2562 |
| SNS-LDH      | 11.2922                | 0.7830 | 22.8368                | 0.3891 | 35.2346                | 0.2545 |
| BUs-SNS-LDH  | 11.1589                | 0.7923 | 22.5702                | 0.3936 | 34.9947                | 0.2562 |
|              |                        |        |                        |        |                        |        |
| LDH-4        | 10.7590                | 0.8216 | 22.0636                | 0.4026 | 34.728                 | 0.2581 |
| SHS-LDH      | 11.1589                | 0.7923 | 22.5702                | 0.3936 | 34.4881                | 0.2598 |
| BUs-SHS-LDH  | 11.0256                | 0.8018 | 22.3302                | 0.3978 | 34.728                 | 0.2581 |

Note: Bragg's equation;  $\lambda = 2d\sin\theta$ , where  $\lambda=1.5406 \text{ \AA}$  (0.15406 nm)

**Table S3** Matrix effect (ME, %) data of target BUs in the studied soft drink samples

| Sample                    | Analyte | Sm   | Ss   | ME (%) | ME level* | R <sup>2</sup> |        |
|---------------------------|---------|------|------|--------|-----------|----------------|--------|
|                           |         |      |      |        |           | Sm             | Ss     |
| Bael fruit                | DFL     | 1092 | 1315 | 83     | No        | 0.9918         | 0.9991 |
|                           | TRF     | 2367 | 1984 | 119    | Minor     | 0.9921         | 0.9981 |
|                           | HXF     | 1000 | 1340 | 75     | Minor     | 0.9933         | 0.9981 |
|                           | TFL     | 825  | 1013 | 81     | No        | 0.9976         | 0.9986 |
|                           | FLU     | 1124 | 1245 | 90     | No        | 0.9971         | 0.9983 |
|                           | FLF     | 1526 | 1718 | 89     | No        | 0.9964         | 0.9979 |
| White tea chrysanthemum   | DFL     | 695  | 1315 | 53     | Minor     | 0.9918         | 0.9991 |
|                           | TRF     | 1926 | 1984 | 97     | No        | 0.9921         | 0.9981 |
|                           | HXF     | 950  | 1340 | 71     | Minor     | 0.9933         | 0.9981 |
|                           | TFL     | 698  | 1013 | 69     | Minor     | 0.9976         | 0.9986 |
|                           | FLU     | 907  | 1245 | 73     | Minor     | 0.9971         | 0.9983 |
|                           | FLF     | 1278 | 1718 | 74     | Minor     | 0.9964         | 0.9979 |
| Chrysanthemum & chamomile | DFL     | 796  | 1315 | 60     | Minor     | 0.9935         | 0.9991 |
|                           | TRF     | 1583 | 1984 | 80     | No        | 0.9978         | 0.9981 |
|                           | HXF     | 1036 | 1340 | 77     | Minor     | 0.9971         | 0.9981 |
|                           | TFL     | 811  | 1013 | 80     | No        | 0.9933         | 0.9986 |
|                           | FLU     | 1200 | 1245 | 96     | No        | 0.9955         | 0.9983 |
|                           | FLF     | 2285 | 1718 | 133    | Minor     | 0.9981         | 0.9979 |
| Jiaogulan & safflower     | DFL     | 499  | 1315 | 38     | Major     | 0.9943         | 0.9991 |
|                           | TRF     | 1274 | 1984 | 64     | Minor     | 0.9946         | 0.9981 |
|                           | HXF     | 1097 | 1340 | 82     | No        | 0.9955         | 0.9981 |
|                           | TFL     | 836  | 1013 | 83     | No        | 0.9962         | 0.9986 |
|                           | FLU     | 1151 | 1245 | 92     | No        | 0.9966         | 0.9983 |
|                           | FLF     | 2230 | 1718 | 130    | Minor     | 0.9951         | 0.9979 |

Sm: slope of calibration in sample matrix

Ss: slope of calibration in solvent medium

\*Matrix effect level:

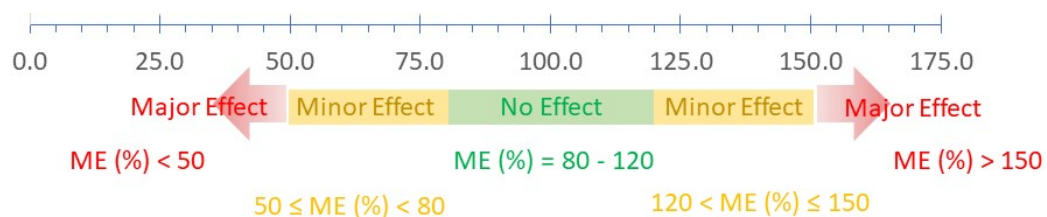

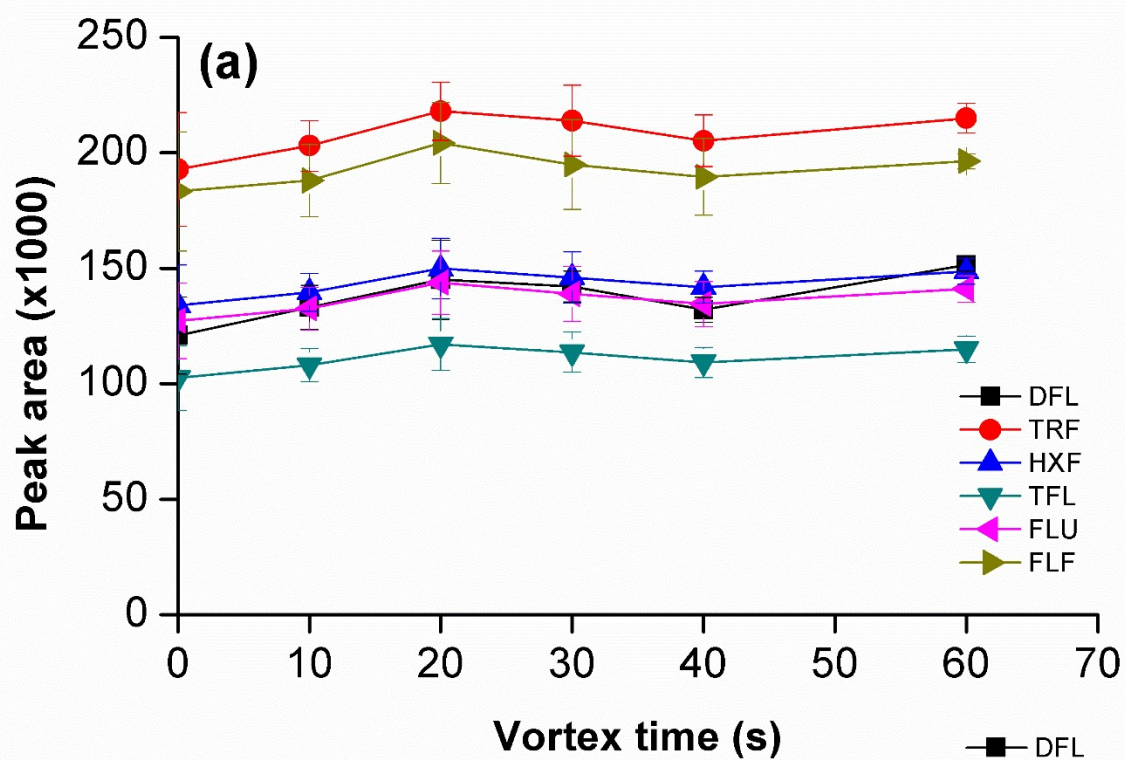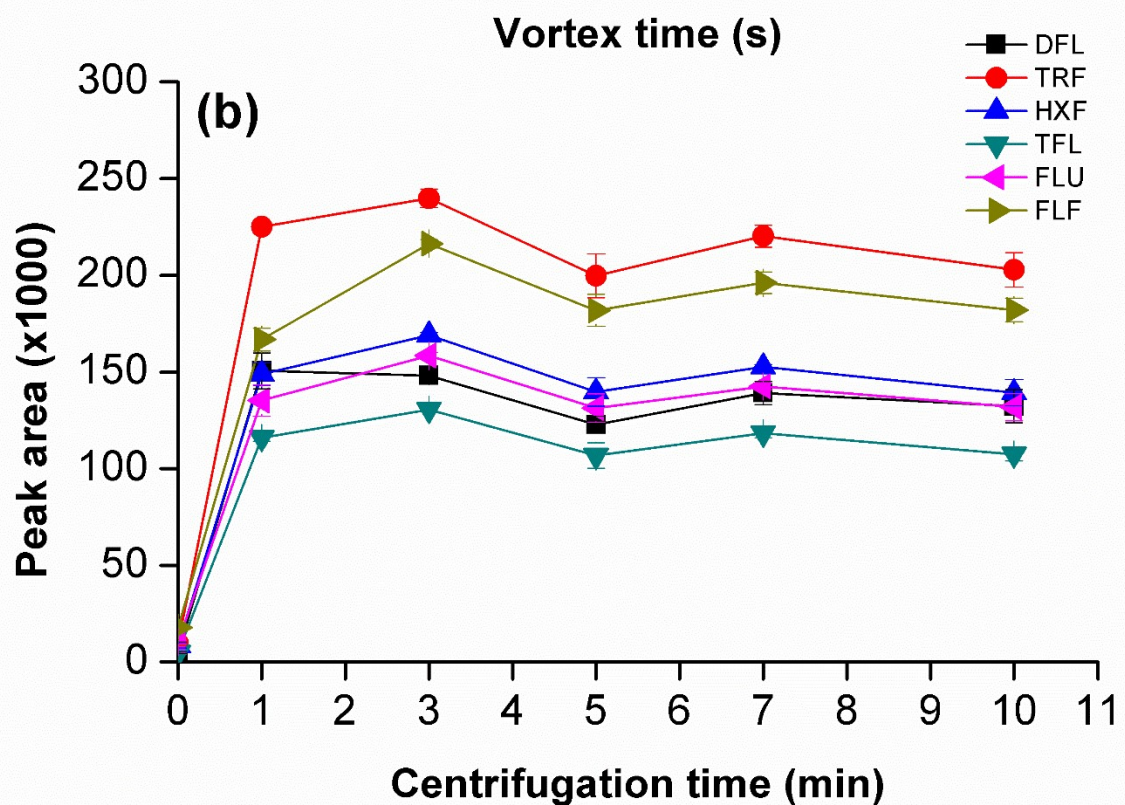

Figure S1 Effect of (a) vortex time and (b) centrifugation time on the extraction performance

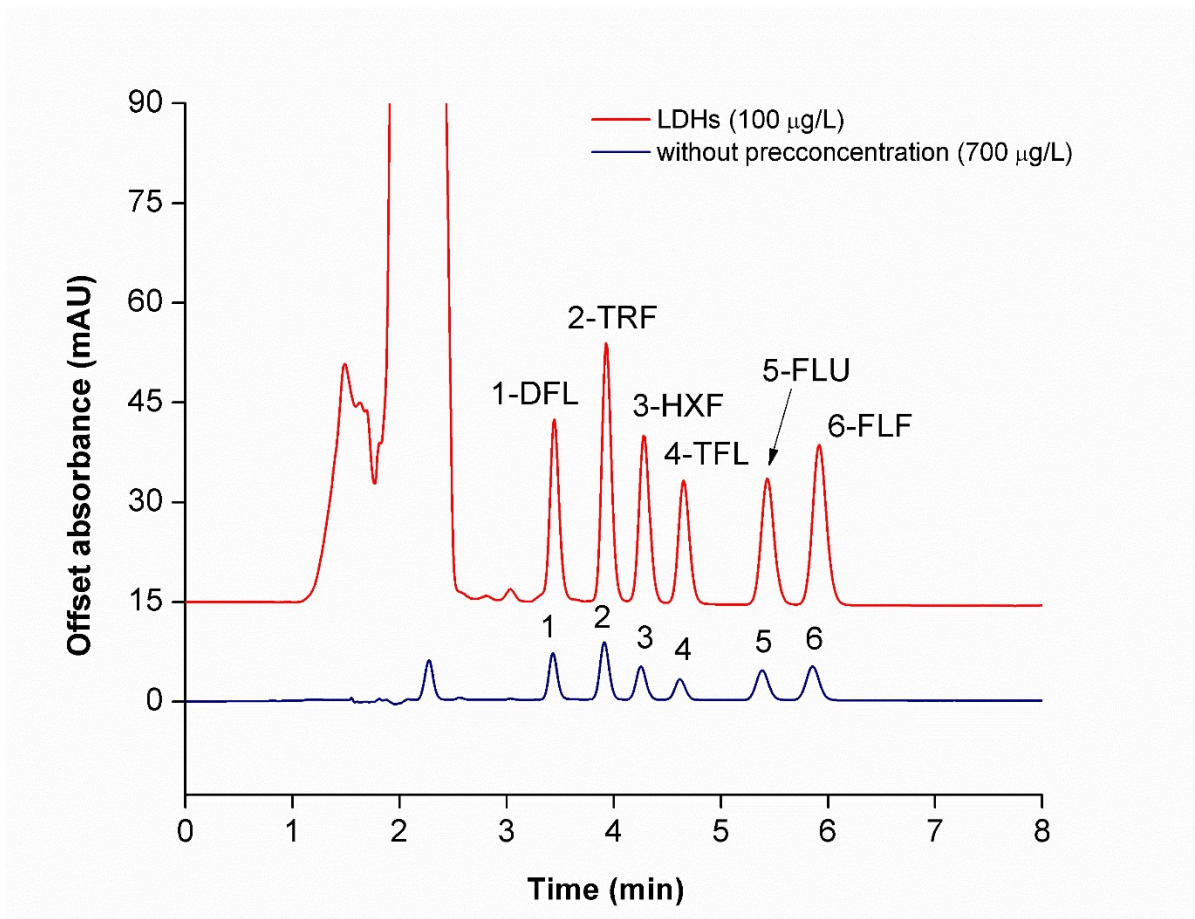

**Figure S2** Overlaid chromatograms of target BUs obtained from without preconcentration and preconcentration with LDHs



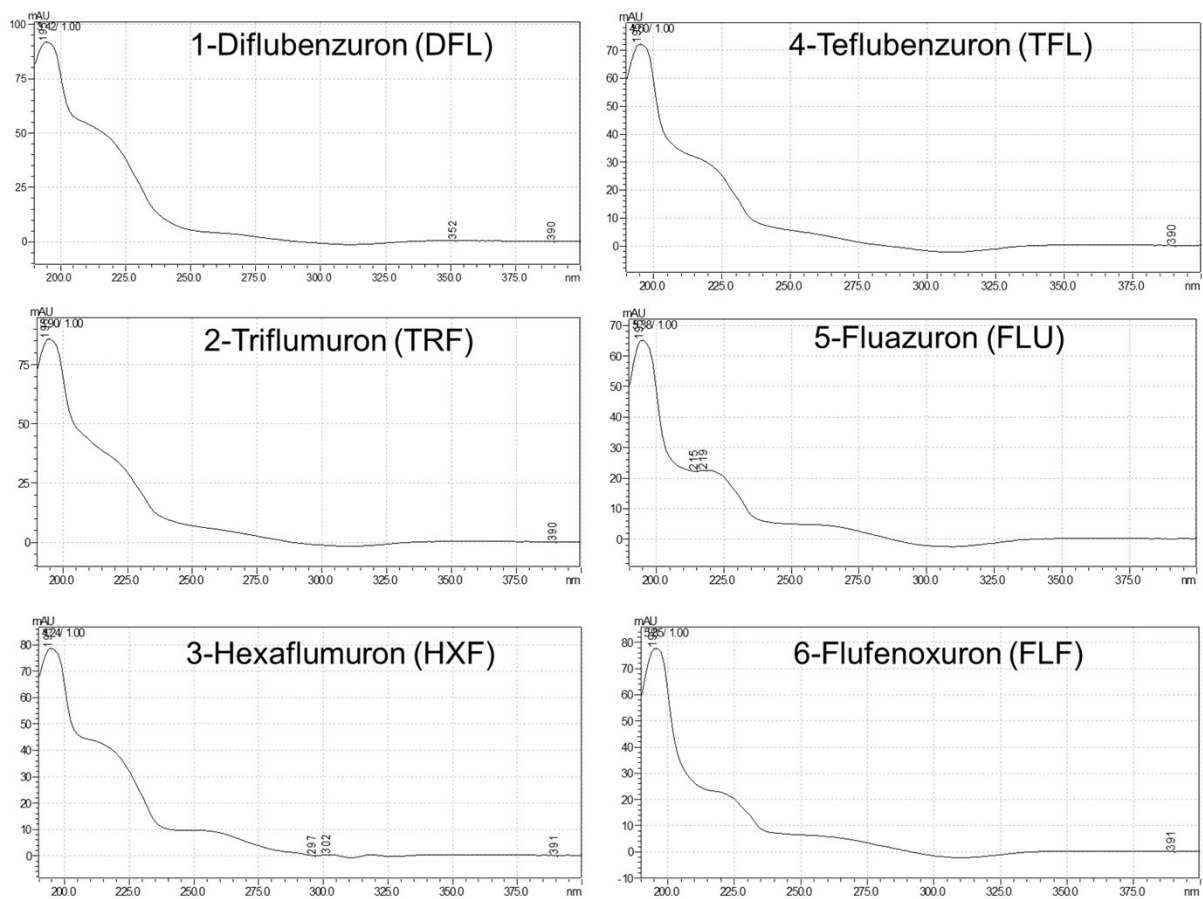

**Figure S3** Absorption spectra of six benzoylurea insecticides obtained from HPLC-photo-diode array detector.
